# Supplementary material for: Wadsley–Roth phase CoNb11O29 as a high-performance anode for lithium-ion batteries
Source: Royal Society of Chemistry journal article supplement (doi:10.1039/d3ta07865e), 2024-01-01
Supplement: d3ta07865e1.pdf [file d3ta07865e1.pdf]

# Supporting Information

## **Wadsley-Roth phase $\text{CoNb}_{11}\text{O}_{29}$ as a high-performance anode for lithium-ion batteries**

Huaibing Liu, Chunhua Chen\*

CAS Key Laboratory of Precision and Intelligent Chemistry, Department of Materials Science and Engineering, University of Science and Technology of China, Hefei 230026, China

\* Address correspondence to [cchchen@ustc.edu.cn](mailto:cchchen@ustc.edu.cn)

Prof. C.H. Chen

Department of Materials Science and Engineering

University of Science and Technology of China

Hefei 230026, P. R. China

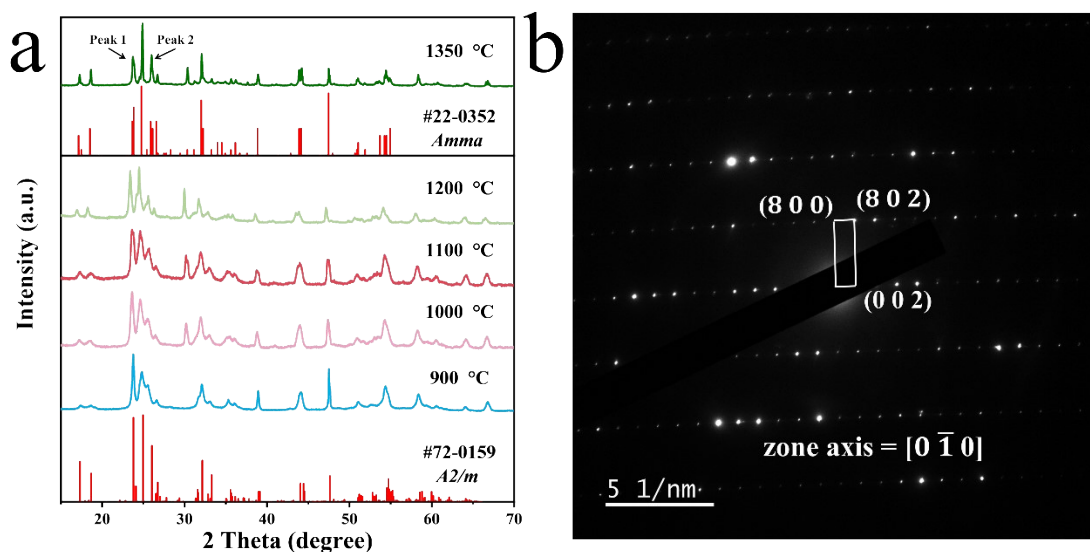

**Fig. S1.** (a) XRD patterns of  $\text{CoNb}_{11}\text{O}_{29}$  at 900, 1000, 1100, 1200, and 1350 °C and (b) selected area electron diffraction (SAED) pattern of 1350 °C-sintered  $\text{CoNb}_{11}\text{O}_{29}$ .

From **Fig. S1a** we can see that there are two polymorphs of  $\text{CoNb}_{11}\text{O}_{29}$ . When the synthesis temperature is below 1250 °C, all of the XRD peaks can be confirmed to a  $\text{Ti}_2\text{Nb}_{10}\text{O}_{29}$ -type crystal structure (JCPDS#72-0159), i.e., a monoclinic shear  $\text{ReO}_3$  crystal structure with  $A2/m$  space group, which is a result of the low calcination temperature. When the synthesis temperature is above 1250 °C, all of the XRD peaks match those of  $\text{FeNb}_{11}\text{O}_{29}$  (JCPDS#22-0352), i.e., an orthorhombic shear  $\text{ReO}_3$  crystal structure with  $Amma$  space group, which is a result of the high calcination temperature.<sup>S1-S8</sup> Moreover, the intensity of peak 1 is always lower than peak 2 in monoclinic phase. While in orthorhombic phase, the intensity of two peaks is very close. The SAED pattern of 1350 °C-sintered  $\text{CoNb}_{11}\text{O}_{29}$  in **Fig. S1b** also demonstrates the orthorhombic phase structure.

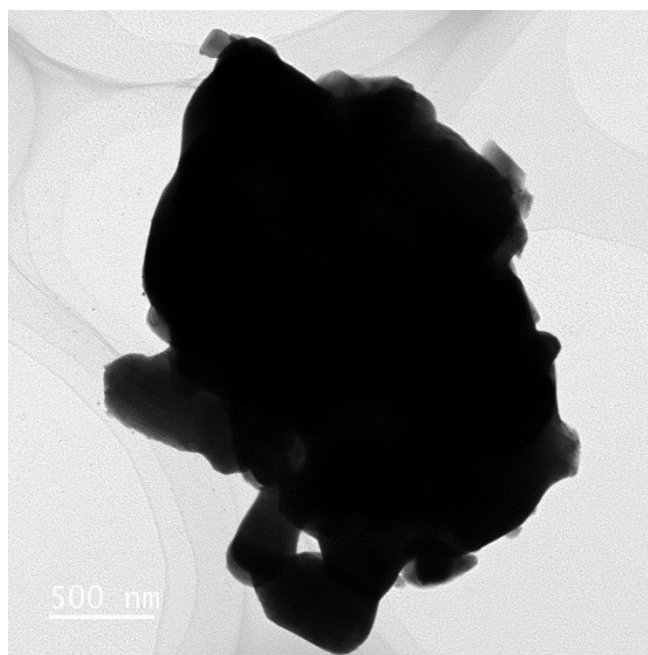

**Fig. S2.** TEM image of CoNb<sub>11</sub>O<sub>29</sub>.

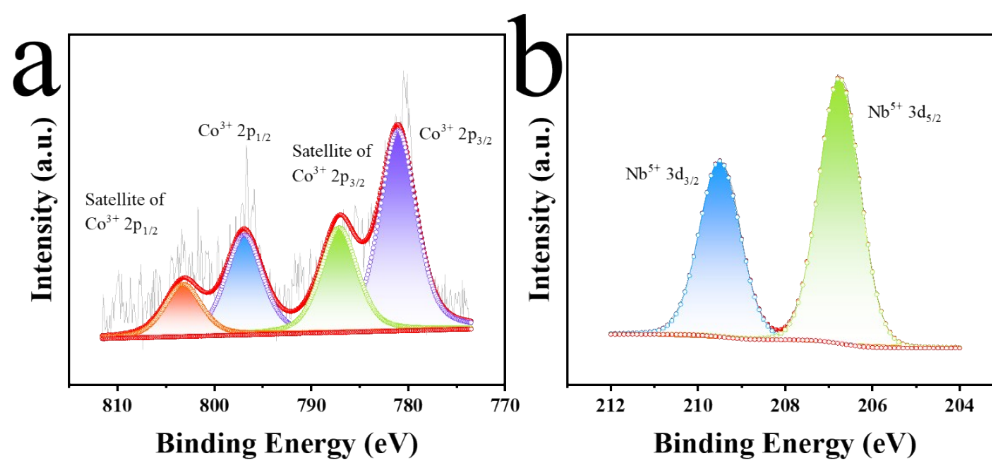

**Fig. S3.** Ex-situ high-resolution X-ray photoelectron spectroscopy (XPS) of  $\text{CoNb}_{11}\text{O}_{29}$  powder (a) Co 2p and (b) Nb 3d spectrum.

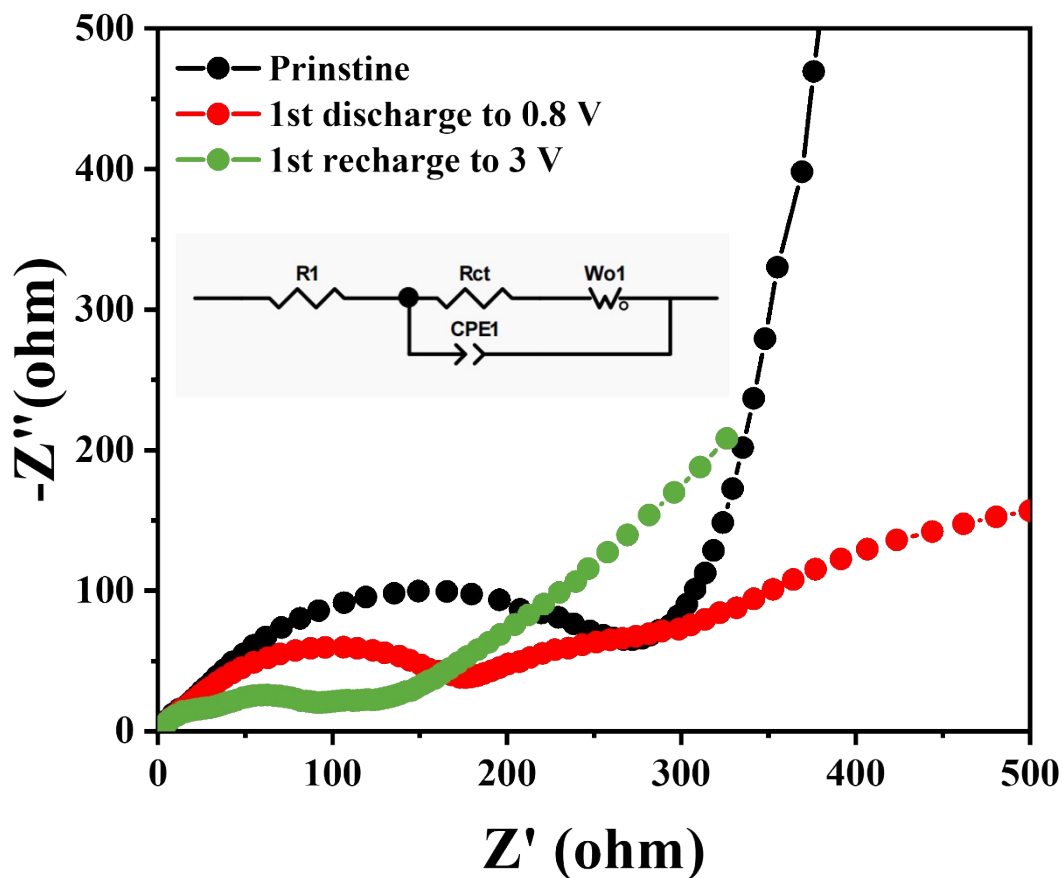

**Fig. S4.** Nyquist plots and the inset equivalent circuit of different states.

As we can see from the Nyquist plots, all the states show a semicircle in the medium-frequency region, corresponding to the charge transfer resistance ( $R_{ct}$ ) at the interface between the electrodes and the electrolyte. When in the open circuit state, the  $R_{ct}$  is 328 Ω. After initially discharged to 0.8 V, the  $R_{ct}$  decreases to 144 Ω. When recharged to 3V, the  $R_{ct}$  is reduced to 60 Ω. After electrode fully activated, the charge transfer resistance diminishes, resulting in faster conduction of both electrons and Li-ion during the intercalation/deintercalation process.

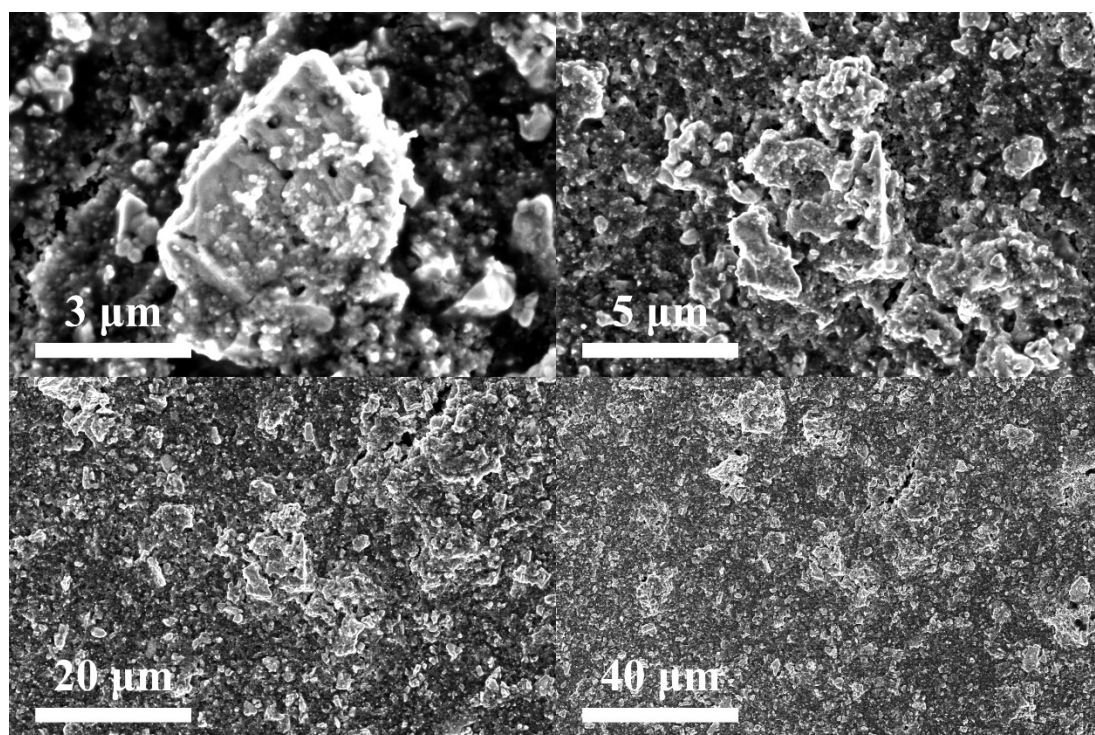

**Fig. S5.** SEM images of CoNb<sub>11</sub>O<sub>29</sub> electrode after 5000 cycles.

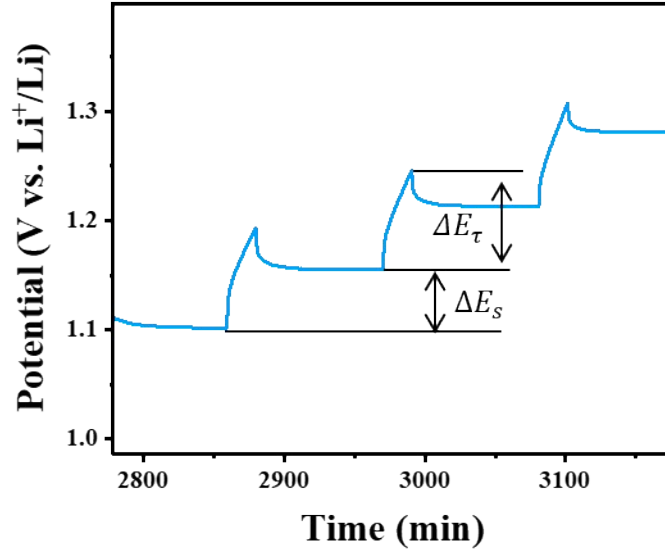

**Fig. S6.** The detailed charging step in GITT measurements of  $\text{CoNb}_{11}\text{O}_{29}$ .

The  $D_{\text{Li}}$  can be calculated via galvanostatic intermittent titration technique (GITT) curves by Fick's second law (Equation S1),

$$D_{\text{Li}} = \frac{4}{\pi\tau} \left( \frac{m_B V_m}{M_B S} \right)^2 \left( \frac{\Delta E_s}{\Delta E_\tau} \right)^2 \left( \tau \ll \frac{L^2}{D_{\text{Li}}} \right) \quad (\text{S1})$$

where  $\tau$ ,  $m_B$ ,  $V_m$ ,  $M_B$ ,  $S$ , and  $L$  present the time of the applied constant current, mass of the active material, molar volume of the active material, molar mass of the active material, electrode surface area, and the thickness of the electrode, respectively.  $\Delta E_s$  represents the voltage difference between two adjacent equilibrium states, and  $\Delta E_\tau$  represents the voltage variation during the constant current pulse applied process.

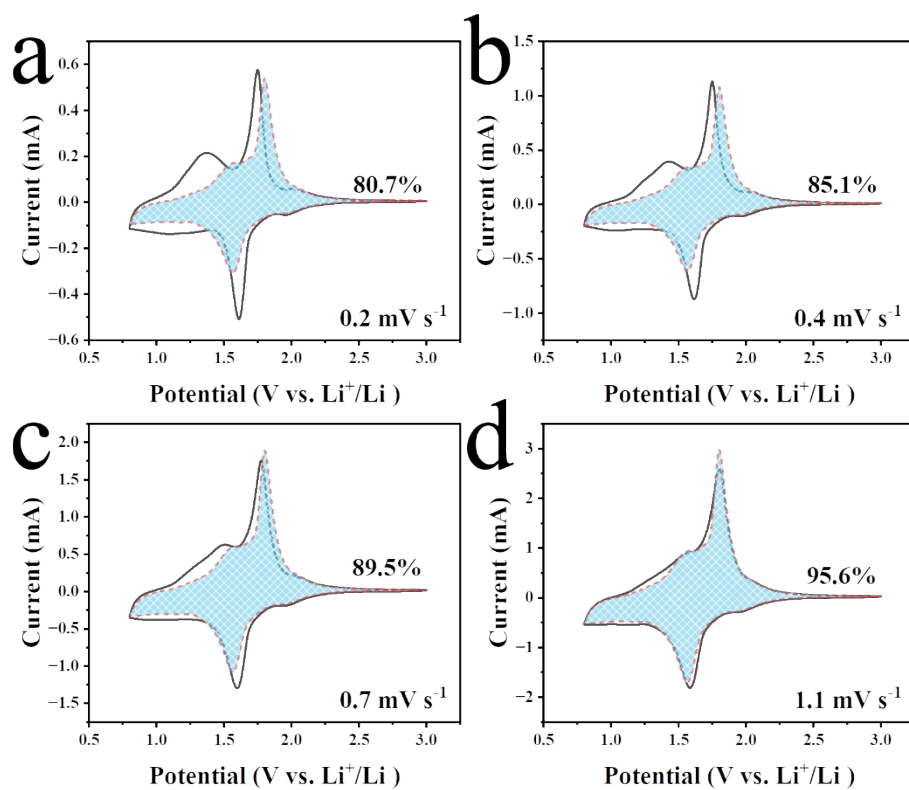

**Fig. S7.** Detailed CV curve at various scan rates.

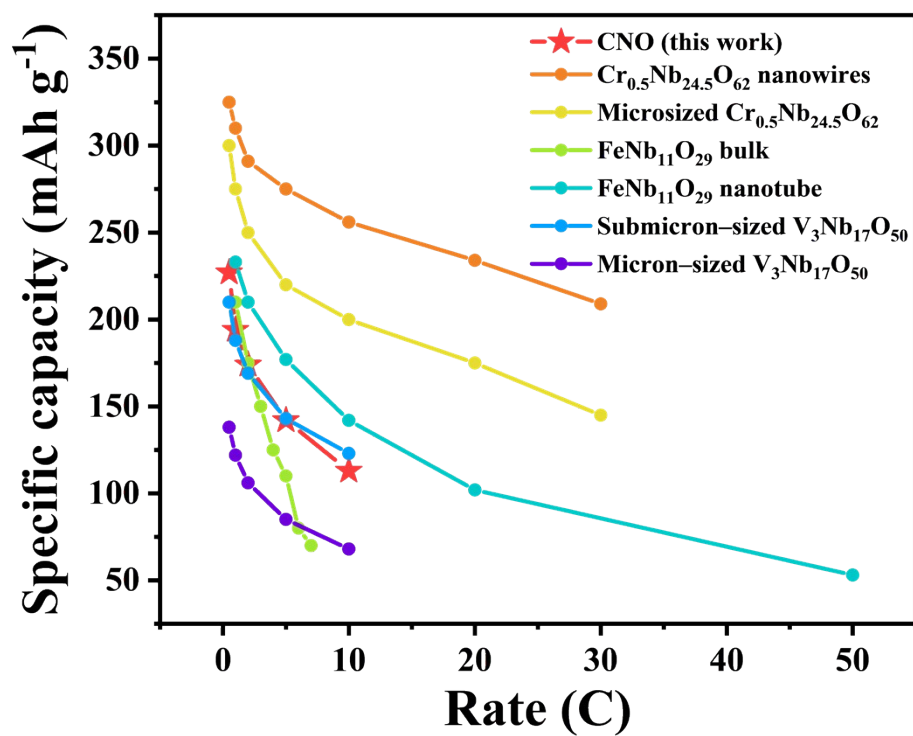

**Fig. S8.** The comparison of rate performance with Cr, Fe, V-doping samples.

**Table S1.** The fractional atomic information of CoNb<sub>11</sub>O<sub>29</sub> with *Amma* space group.

| Atom <sup>*</sup> | Symmetry | Site | <i>x</i> | <i>y</i> | <i>z</i> |
|-------------------|----------|------|----------|----------|----------|
| M1                | m        | 8f   | 0.04656  | 0        | 0.03869  |
| M2                | m        | 8f   | 0.04958  | 0        | 0.66768  |
| M3                | m        | 8f   | 0.04862  | 0        | 0.85178  |
| M4                | m        | 8f   | 0.18901  | 0        | 0.03691  |
| M5                | m        | 8f   | 0.18210  | 0        | 0.66821  |
| M6                | m        | 8f   | 0.18085  | 0        | 0.85314  |
| O1                | m2m      | 4c   | 0.25     | 0        | 0.04165  |
| O2                | m2m      | 4c   | 0.25     | 0        | 0.66732  |
| O3                | m2m      | 4c   | 0.25     | 0        | 0.85101  |
| O4                | m        | 8f   | 0.04411  | 0        | 0.56183  |
| O5                | m        | 8f   | 0.03562  | 0        | 0.14873  |
| O6                | m        | 8f   | 0.03791  | 0        | 0.75654  |
| O7                | m        | 8f   | 0.03282  | 0        | 0.34633  |
| O8                | m        | 8f   | 0.02761  | 0        | 0.94882  |
| O9                | m        | 8f   | 0.11222  | 0        | 0.03361  |
| O10               | m        | 8f   | 0.11133  | 0        | 0.66154  |
| O11               | m        | 8f   | 0.10862  | 0        | 0.85896  |
| O12               | m        | 8f   | 0.17901  | 0        | 0.56033  |
| O13               | m        | 8f   | 0.18122  | 0        | 0.14452  |
| O14               | m        | 8f   | 0.17714  | 0        | 0.75704  |
| O15               | m        | 8f   | 0.17961  | 0        | 0.35142  |
| O16               | m        | 8f   | 0.18443  | 0        | 0.94754  |

<sup>\*</sup>M = 1/11Co<sup>3+</sup> + 11/12Nb<sup>5+</sup>

**Table S2.** The comparison of cycling performance with Cr, Fe, V–doping samples.

| Electrode materials                                                | Cycling performance                                         | References       |
|--------------------------------------------------------------------|-------------------------------------------------------------|------------------|
| <b>CoNb<sub>11</sub>O<sub>29</sub></b>                             | <b>73% capacity retention<br/>after 5000 cycles at 10 C</b> | <b>This work</b> |
| Microsized<br>Cr <sub>0.5</sub> Nb <sub>24.5</sub> O <sub>62</sub> | 82.4% capacity retention<br>after 1000 cycles at 10 C       | [17]             |
| Cr <sub>0.5</sub> Nb <sub>24.5</sub> O <sub>62</sub><br>nanowires  | 92.8% capacity retention<br>after 1000 cycles at 10 C       | [17]             |
| FeNb <sub>11</sub> O <sub>29</sub> nanotube                        | 71.2% capacity retention after<br>2000 cycles at 10 C       | [18]             |
| Submicron–sized<br>V <sub>3</sub> Nb <sub>17</sub> O <sub>50</sub> | 91.8% capacity retention after<br>2000 cycles at 10 C       | [19]             |
| Micron–sized<br>V <sub>3</sub> Nb <sub>17</sub> O <sub>50</sub>    | 90.0% capacity retention after<br>2000 cycles at 10 C       | [19]             |

## References

- [S1] P. Tabero, *Ceram.-Silik.*, 2005, **49**, 126-131.
- [S2] D. Spada, M. C. Mozzati, B. Albin, P. Galinetto, I. Quinzeni, D. Capsoni and M. Bini, *Dalton Trans.*, 2018, **47**, 15816-15826.
- [S3] D. Spada, I. Quinzeni and M. Bini, *Electrochim. Acta*, 2019, **296**, 938-944.
- [S4] D. Spada, B. Albin, P. Galinetto, D. Versaci, C. Francia, S. Bodoardo, G. Bais and M. Bini, *Electrochim. Acta*, 2021, **393**, 139077.
- [S5] D. Le Thanh, A. Guet, E. Suard and R. Berthelot, *J. Solid State Chem.*, 2024, **330**, 124444.
- [S6] R. T. Zheng, S. S. Qian, X. Cheng, H. X. Yu, N. Peng, T. T. Liu, J. D. Zhang, M. T. Xia, H. J. Zhu and J. Shu, *Nano Energy*, 2019, **58**, 399-409.
- [S7] I. Pinus, M. Catti, R. Ruffo, M. M. Salamone and C. M. Mari, *Chem. Mater.*, 2014, **26**, 2203-2209.
- [S8] Z. H. Lv, H. Zhu, W. W. Meng, L. C. Wei, Y. Yang, Y. F. Zhang, M. H. Ye and C. C. Li, *Appl. Phys. Rev.*, 2021, **8**, 031404.
